# Supplementary material
Source: HighWire-hosted journal article supplement (https://ijgc.bmj.com/content/29/7/1164)
Supplement: inline-supplementary-material-1 [file inline-supplementary-material-1.pdf]

Figure S1. Summary of all recurrence patients:

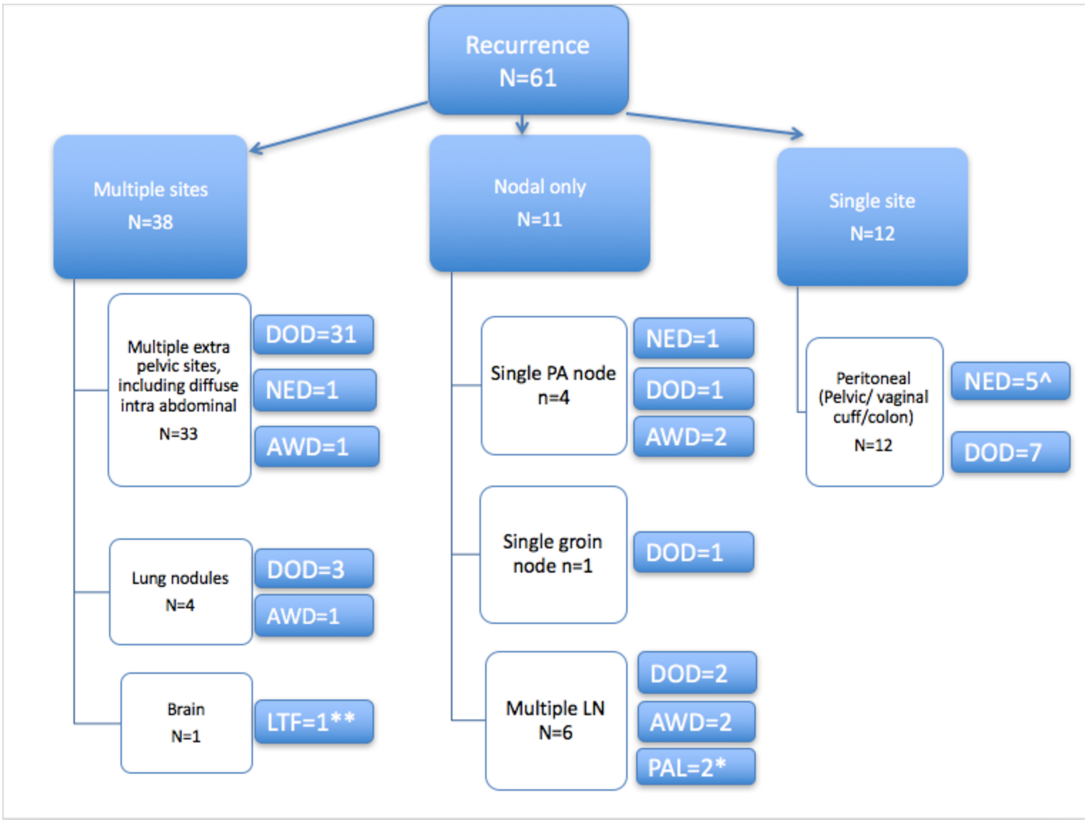

DOD= died of disease, LTF=loss to follow-up, NED=no-evidence of disease, AWD=alive with disease, PAL=palliative, PA=para-aortic, LN=lymph nodes  
\*Those patients were referred to hospice  
\*\*This patient was LTF after she was diagnosed with recurrence  
^One of this patients was free of disease 10 years post treatment for recurrence, she died of stroke (not disease related).
